1     **Population Dynamics of Immunological Synapse Formation Induced by Bispecific T-cell**  
2             **Engagers Predict Clinical Pharmacodynamics and Treatment Resistance**

3  
4             **Can Liu<sup>1</sup>, Jiawei Zhou<sup>1</sup>, Stephan Kudlacek<sup>2</sup>, Timothy Qi<sup>1</sup>, Tyler Dunlap<sup>1</sup>, Yanguang Cao<sup>1,3\*</sup>**  
5

6  
7     <sup>1</sup>Division of Pharmacotherapy and Experimental Therapeutics, School of Pharmacy, University of North  
8     Carolina at Chapel Hill, NC 27599, USA; <sup>2</sup>Department of Biochemistry and Biophysics, University of  
9     North Carolina at Chapel Hill, NC 27599, USA; <sup>3</sup>Lineberger Comprehensive Cancer Center, School of  
10    Medicine, University of North Carolina at Chapel Hill, NC 27599, USA.

11

12    \* **Corresponding author:**

13    Yanguang Cao, Ph.D.

14    E-mail: [yanguang@unc.edu](mailto:yanguang@unc.edu)

15    2318 Kerr Hall, UNC Eshelman School of Pharmacy, Chapel Hill, NC 27599-7569

16

## 17 **Abstract**

18 Effector T cells form immunological synapses (IS) with recognized target cells to elicit cytolytic  
19 effects. Facilitating IS formation is the principal pharmacological action of most T cell-based  
20 cancer immunotherapies. However, the dynamics of IS formation at the cell population level, the  
21 primary driver of the pharmacodynamics of many cancer immunotherapies, remains poorly  
22 defined. With classic immunotherapy CD3/CD19 bispecific T cell engager (BiTE) as a model  
23 system, we integrate experimental and theoretical approaches to investigate the population  
24 dynamics of IS formation and their relevance to clinical pharmacodynamics and treatment  
25 resistance. Our models produce experimentally consistent predictions when defining IS  
26 formation as a series of spatiotemporally coordinated events driven by molecular and cellular  
27 interactions. The models predict tumor-killing pharmacodynamics in patients and reveal  
28 trajectories of tumor evolution across anatomical sites under BiTE immunotherapy. Our model  
29 highlight the bone marrow may serve as a sanctuary site permitting tumor evolution and antigen  
30 escape. The models also suggest the optimal dosing regimens as a function of tumor growth and  
31 patient T cell abundance that confer adequate tumor control with minimal disease evolution. This  
32 work has implications for developing more effective T cell-based cancer immunotherapies.

## 33 **Introduction**

34 Immunotherapy is a type of cancer treatment that helps patients' immune system fight cancer,  
35 and these therapies include immune checkpoint inhibitors and bispecific T cell engagers (BiTE).  
36 Despite many successes, multiple challenges persist. For instance, only a fraction of patients  
37 respond, and many responders eventually relapse (*Nagorsen et al., 2012; Thakur et al., 2018;*  
38 *Topp et al., 2014*). The primary pharmacological action of cancer immunotherapies is to activate  
39 or reinvigorate the effector T cells to find and engage tumor cells and eventually form cytolytic  
40 immunological synapses (IS). BiTE, as a unique type of cancer immunotherapy, can redirect T  
41 cells to bind specific antigens on tumor cells and form IS. Facilitating the formation of IS  
42 through tight intercellular apposition lead to cytolysis of the tumor cell. IS formation is therefore  
43 a critical step for BiTE pharmacodynamics (*Nagorsen et al., 2012*). Like the IS formed between  
44 antigen-presenting cells and T cells, BiTE-induced IS formation between tumor cells and T cells  
45 is a precisely orchestrated cascade of molecular and cellular interactions (*Delon and Germain,*  
46 *2000; Roda-Navarro and Álvarez-Vallina, 2020*). Understanding the dynamics of IS formation  
47 at the cell population level and factors governing this process hold promise to predicting  
48 pharmacodynamics and treatment resistance, one of the most critical issues for immunotherapies.

49 The molecular mechanisms of IS formation have been widely studied to identify potential  
50 molecular targets for cancer immunotherapy (*Finetti et al., 2018; Xiong et al., 2018*). However,  
51 IS formation at the macroscopic cell population level extends beyond molecular crosslinking and  
52 involves multiple steps of intercellular interactions, such as T cells scanning of target cells in the  
53 tumor microenvironment, slowing their motility upon recognition, and establishing intercellular  
54 adhesion in response to signals generated by the first encounter (*Dustin and Cooper, 2000;*  
55 *Fousek et al., 2021*). Previous pharmacodynamic models of BiTE immunotherapy have focused,  
56 almost exclusively, on the mechanisms of molecular crosslinking, with little consideration for  
57 macroscopic intercellular interactions (*Betts et al., 2019; Jiang et al., 2018; Schropp et al.,*  
58 *2019; Song et al., 2021*). We sought to investigate how intercellular interactions at the  
59 population level could provide further insight into IS formation dynamics, BiTE  
60 pharmacodynamics, and mechanisms of resistance.

61 Tumor cells reside in dynamic and heterogeneous microenvironments. Suboptimal BiTE  
62 efficacy could result from insufficient numbers of effector cells, poor drug penetration into tumor

63 tissue, and antigen loss leading to immune escape. Characterizing IS formation dynamics under  
64 diverse conditions, such as varying T cell density, BiTE concentration, antigen binding affinity,  
65 and antigen expression, could provide insights into factors determining BiTE pharmacodynamics  
66 and possible mechanisms of tumor resistance. Bell. et al. developed theoretical models of cell-  
67 cell adhesion (*Bell, 1978*) that highlighted not only the importance of cell-surface receptors and  
68 ligands, but also biophysical factors including receptor diffusivity on the cell membrane and  
69 hydrodynamic shearing forces. By now, to our knowledge, there has been no theoretical  
70 framework developed to characterize the population dynamics of IS formation, limiting our  
71 ability to predict the pharmacodynamics of and resistance to cancer immunotherapies.

72 In this study, we applied imaging flow cytometry to quantify BiTE-induced IS formation  
73 dynamics under various experimental conditions. Additionally, we developed theoretical models  
74 to simulate IS formation on different spatiotemporal scales to interrogate factors influential to  
75 this process. After considering patient-specific parameters, models incorporating IS formation  
76 dynamics adequately predicted tumor-killing pharmacodynamics in patients. These models  
77 revealed trajectories of antigen escape and tumor evolution across anatomical sites, and predicted  
78 optimal doses and regimens that could confer effective tumor control with reduced disease  
79 evolution. Our work shows substantial implications for developing effective T cell-based cancer  
80 immunotherapies.

81

82 **Results**

83 **Experimental design and theoretical models**

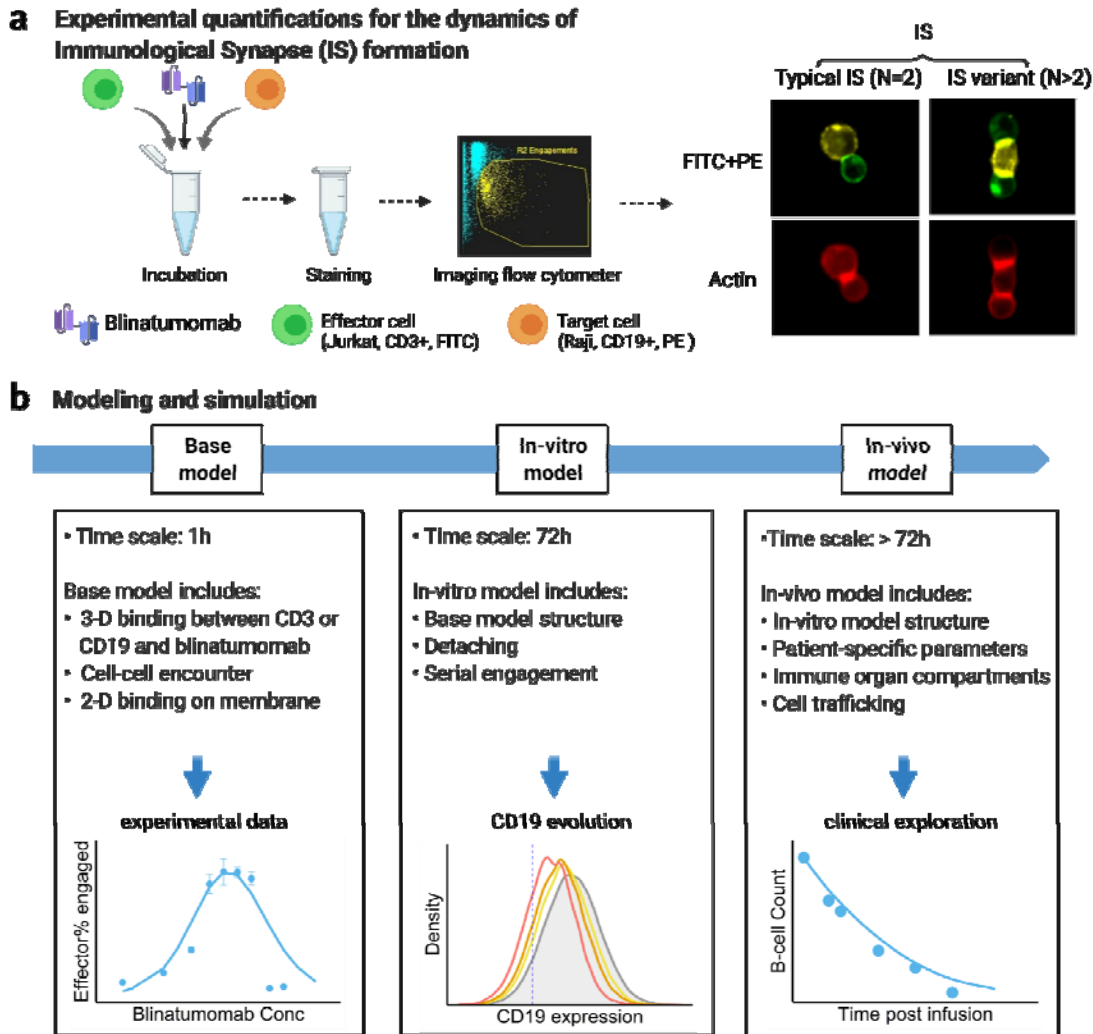

84

85

86 **Figure 1.** Schematic of experimental design and theoretical models. The study examined the  
87 formation dynamics of immunological synapses (IS) elicited by a bispecific T cell engager  
88 (BiTE). **a**, The abundance and dynamics of IS formation were quantified by imaging flow  
89 cytometry under various experimental conditions. **b**, Three mechanistic agent-based models were  
90 developed for comprehensive characterization of cell-cell engagement and tumor-killing effects  
91 on different spatiotemporal scales. 3-D, three-dimensional; 2-D, two-dimensional.

92

93 The formation dynamics of the BiTE-induced IS were the focus of this study. As depicted in  
94 **Figure 1a**, CD3<sup>+</sup> Jurkat were used as effector cells (E) while CD19<sup>+</sup> Raji were used as target  
95 cells (T). Jurkat and Raji cells were sorted into three subpopulations, high (H), medium (M), and  
96 low (L), based on their membrane expressions of CD3 or CD19, respectively (**Supplementary**  
97 **Figure S1**). Effector and target cells were then co-incubated in the presence of blinatumomab. IS  
98 formation dynamics were visualized and quantified by imaging flow cytometry (**Figure 1a**,  
99 **Supplementary Figure S2**). We quantified the dynamics of IS formation under various  
100 experimental conditions, including different cell densities, antigen expressions, incubation  
101 durations, E:T ratios, and antibody concentrations. Multiple types of IS were observed and  
102 quantified, including “typical” IS with one effector and one target cell (ET) and “variants” with  
103 three or more cells engaged, such as ETE, ETT, ETET.

104 We developed three mechanistic agent-based models to investigate IS formation and tumor-  
105 killing on different spatiotemporal scales. These models were developed in a stepwise fashion  
106 and calibrated with experimental or clinical data. As shown in **Figure 1b**, the base model was  
107 developed for predicting IS formation dynamics within 1 hour. The base model consists of three  
108 fundamental components during IS formation: three-dimensional (3D) binding between antibody  
109 and antigens (CD3 or CD19) to form binary complexes, the probability of cell-cell encounter,  
110 and cell-cell adhesion driven by two-dimensional (2D) binding to form ternary complexes (CD3-  
111 BiTE-CD19) on the cellular membrane. Model structure for the base model is provided in the  
112 next section.

113 Next, the base model was extended with serial cell-cell engagement dynamics to capture IS  
114 formation and tumor-killing up to 72 hours; we refer to this as the in-vitro model. The in-vitro  
115 model could evaluate the chance for target antigen loss (i.e., CD19), a common mechanism of  
116 immune escape and therapeutic resistance to BiTEs (*Thakur et al., 2018; Topp et al., 2014*).

117 Last, the in-vitro model was expanded to include cell-cell engagement in anatomically distinct  
118 compartments of the body. This model considered infiltration gradients of T and B cells and  
119 organ-to-organ cell trafficking. We refer to this expanded model as the in-vivo model. This  
120 model integrated patient-specific parameters to predict clinically observed profiles of tumor  
121 killing and relapse. The in-vivo model was also applied to support simulation of antigen escape

122 and tumor evolution across anatomical sites and compare dosing regimens for effective tumor  
 123 control in light of tumor evolution.

124 **Model structure (Base model)**

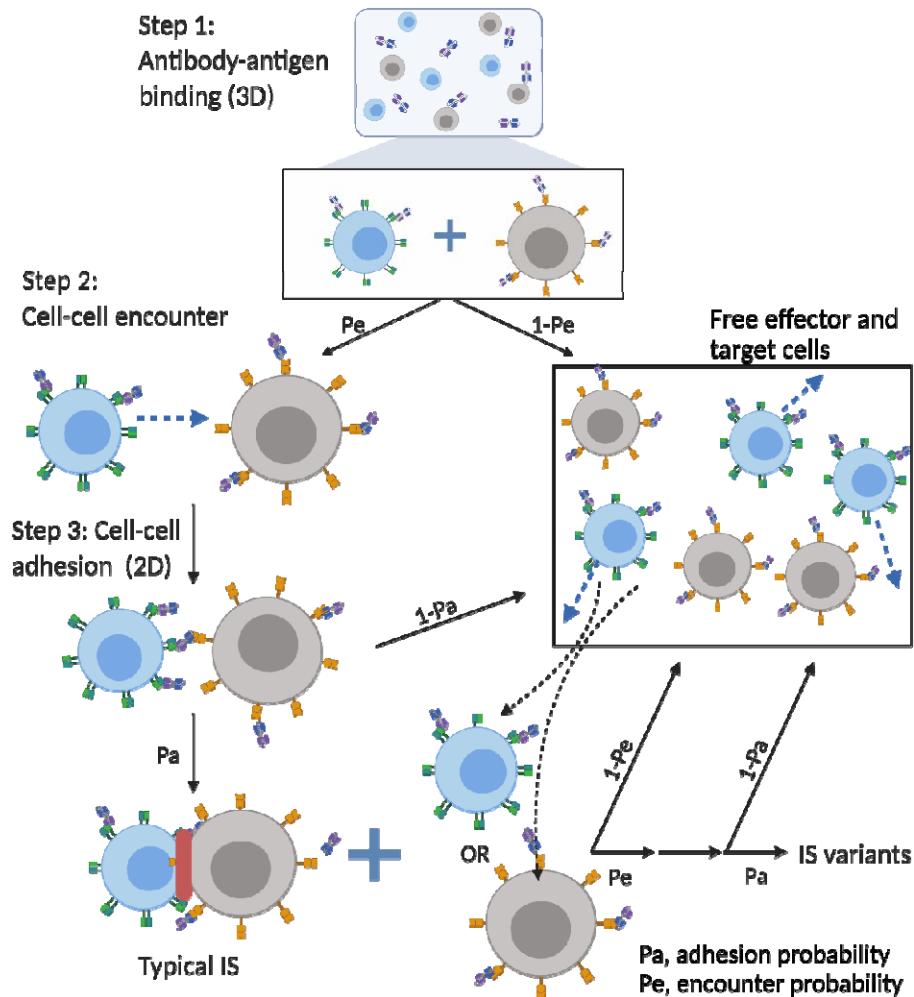

125

126 **Figure 2.** The base model included three essential steps to describe the process of IS formation  
 127 induced by BiTEs. Step 1: three-dimensional (3D) antibody-antigen binding in the media to form  
 128 a binary complex; Step 2: cell-cell encounter, with encounter probability ( $P_e$ ) dictated by cell  
 129 motility and density; Step 3: cell-cell adhesion and IS formation, with adhesion probability ( $P_a$ )  
 130 driven by the density of ternary complexes formed on the cell-cell contact area (two-dimensional  
 131 (2D) binding) during contact. Newly formed typical IS had a chance to engage additional free  
 132 effector or target cells to form an IS variant.

133

134 The major mechanism of BiTE pharmacology is to produce ternary complexes (CD3-BiTE-  
135 CD19) on opposing cell surfaces, driving IS formation. The dynamics of IS formation are,  
136 essentially, two independent and indispensable cellular processes mediated by cell-cell encounter  
137 and cell-cell adhesion. Compared to molecular scale-focused pharmacodynamics models of  
138 BiTEs (*Betts et al., 2019; Jiang et al., 2018; Schropp et al., 2019; Song et al., 2021*), our  
139 models highlight the importance of these two cellular processes for IS formation in the context of  
140 macroscopic and biophysical forces (*Figure 2*).

141 In the base model (*Figure 2*), three essential steps are defined: antibody-antigen binding to  
142 form binary complexes (BiTE-CD3 and BiTE-CD19) (step 1), effector-target cell encounter  
143 probability defined as a function of cell mobility and density (step 2), and effector-target cell  
144 adhesion probability defined as a function of ternary complexes formed during contact (step 3).  
145 Model equations are provided in *Supplementary Figure S3-S9*. Antibody-antigen binding to  
146 form binary complexes (BiTE-CD3 and BiTE-CD19) were assumed to be 3D processes that  
147 reached rapid equilibrium prior to cellular-scale events. Free effector cells were assumed to  
148 follow Brownian motion (*Celli et al., 2012*) and encounter target cells at a probability  
149 proportional to cell density and motility in the incubation environment (*Figure 2*).

150 After cell-cell encounter, the probability of adhesion was modeled to increase as a function of  
151 the number of ternary complexes (CD3-BiTE-CD19) formed between cells during the duration  
152 of contact. Cell-cell complexes with a high number of ternary complexes would therefore have a  
153 higher probability to adhere and eventually form IS. Ternary complex formation on opposing  
154 cells was assumed to be restricted to the cell membrane (2D binding; *Supplementary Figure*  
155 *S6*). The derivation of 2D binding affinities is provided in *Supplementary Figure S8*. Cells that  
156 failed to adhere upon encounter (futile contact) were assumed to diffuse away and become free  
157 to repeat the same process. Two cells engaged in a typical IS were also considered capable of  
158 engaging additional effector or target cells to become an IS variant, per our experimental  
159 observations (*Figure 2*). The model considered IS variants comprising up to 4 cells.

160 Model details and parameters for base, in-vitro and in-vivo models are provided in  
161 *Supplementary Methods, Supplementary Figure S3-S9, and Supplementary Table S1-S3*.

162



163 **Effects of BiTE concentration, cell density, and antigen expression on IS formation**

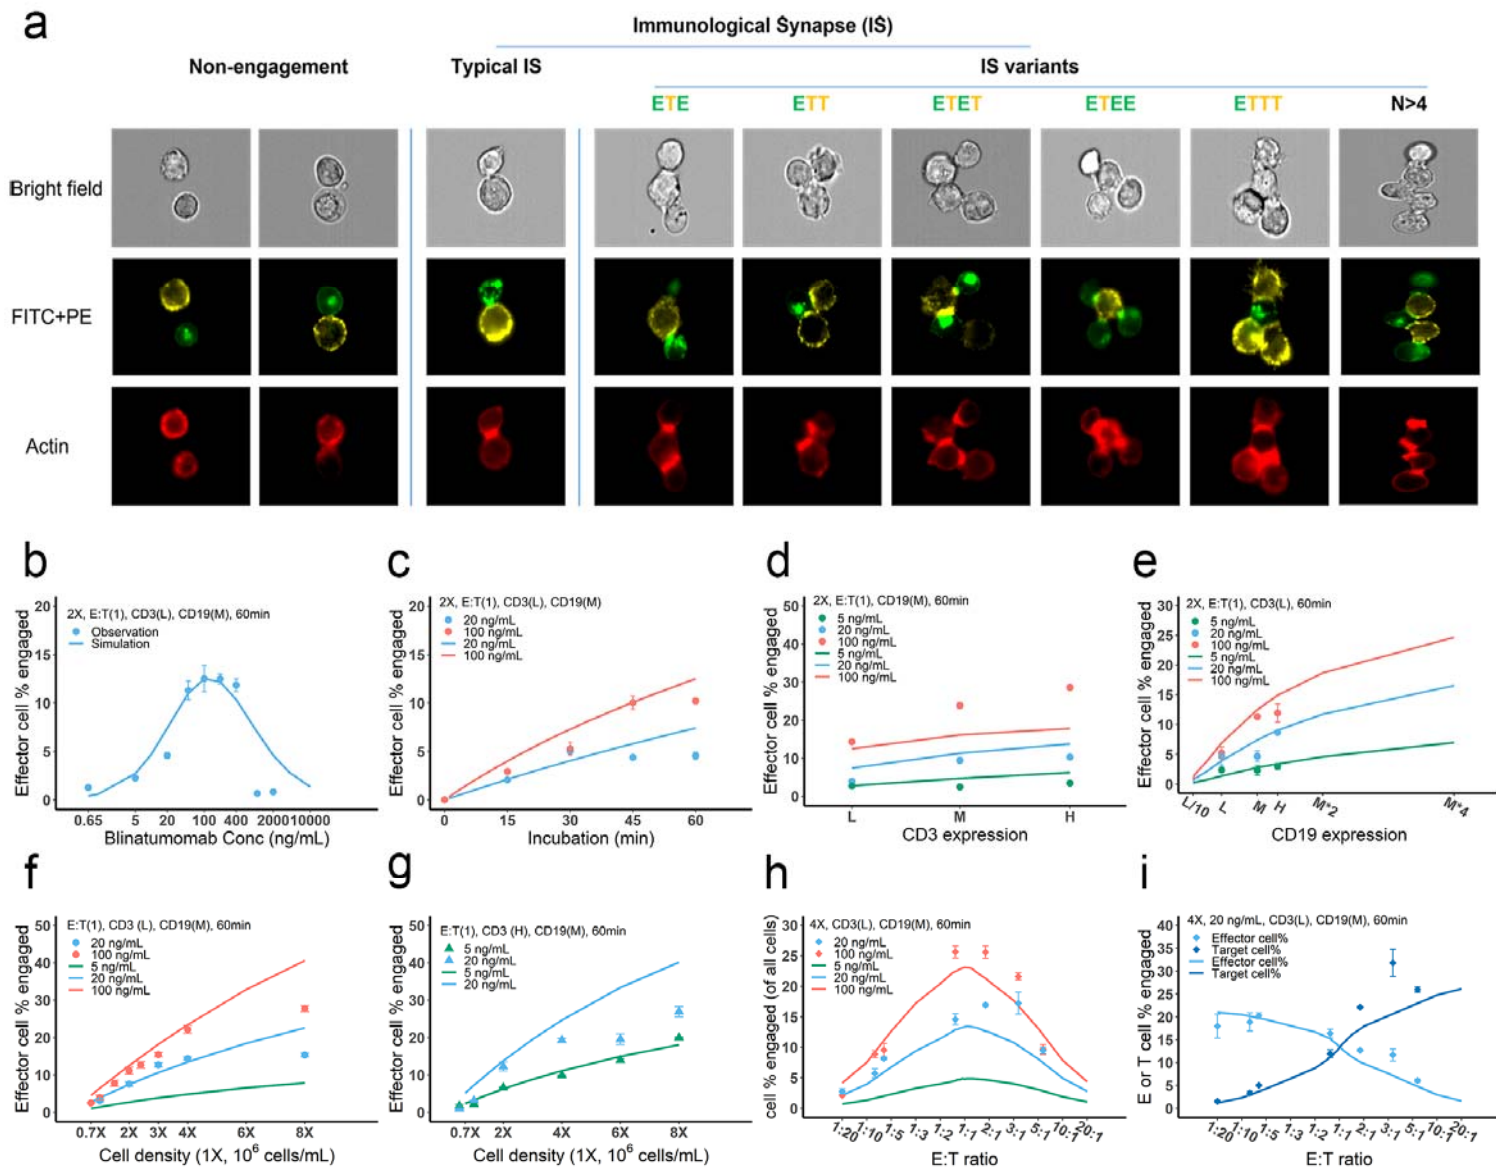

164

165 **Figure 3.** Dynamics of immunological synapse (IS) formation induced by BiTE under different  
 166 conditions. **a**, Representative image of non-engagement (futile encounter), typical IS, and other  
 167 IS variants. Green (FITC), effector cells (E); Yellow (PE), target cells (T). **b-i**, The effects of  
 168 drug concentration (**b**), incubation duration (**c**), antigen density (**d**, **e**), cell density (**f**, **g**) and E:T  
 169 ratio (**h**, **i**) on IS formation. The base model was applied to simulate IS formation under different  
 170 conditions. Observations are dots (with SE) and model simulations are solid curves. 2X,  $2 \times 10^6$   
 171 cells/mL; E:T(1), E:T ratio = 1; CD3(L), CD3 expression (Low); CD3(H), CD3 expression  
 172 (High); CD19(M), CD19 expression (medium); 5, 20, 100 ng/mL, blinatumomab concentration;  
 173 60 min, incubation duration.

174 IS formation dynamics were quantified by imaging flow cytometry. Representative images of  
175 non-engaged (futile contact), typical IS, and multiple IS variants are shown in **Figure 3a**.  
176 Contact between effector and target cells was evaluated in brightfield and FITC + PE channels.  
177 Their interfaces were classified as bona fide IS when there was a high intensity of actin (red) at  
178 the contact site, as F-actin is known to polymerize and locally concentrate at sites of interface  
179 (**Dustin and Cooper, 2000**).

180 To investigate the key influential factors of IS formation, we explored multiple experimental  
181 conditions by varying BiTE concentration (0.65-2000 ng/ml), incubation duration (0-60 min),  
182 antigen expression (three levels for either CD3 or CD19), cell density (0.7-8 million), and E:T  
183 ratio (0.05-6) (**Figure 3b-i**). The fraction (%) of effector cells engaged in IS was quantified to  
184 inform IS formation dynamics. We also ran these experiments virtually using the base model to  
185 test the model's predictive performance and to explore mechanistic hypotheses.

186 In **Figure 3b-i**, the observations (symbols) and model simulations (lines) overlapped,  
187 indicating good base model performance. IS formation in vitro exhibited a bell-shaped  
188 relationship to BiTE concentration (**Figure 3b**). The model predicted this bell-shaped  
189 relationship and revealed that high BiTE concentrations ( $> 100$  ng/ml) would reduce the  
190 formation of ternary complexes, partly because individual antigens (CD3 and CD19) were  
191 almost completely occupied by one arm of the BiTE, limiting crosslinking with opposing cells  
192 (**Supplementary Figure S6**). IS formation increased over time and plateaued around 60 min  
193 (**Figure 3c**). We therefore restricted our incubation to 60 min considering IS quantification could  
194 be biased by serial cell-cell engagements and potential cell lysis (**Fousek et al., 2021**).

195 The effect of CD3 expression on IS formation was relatively small, especially at low BiTE  
196 concentrations (**Figure 3d**). The model revealed that only a small fraction of CD3 was occupied;  
197 therefore, we concluded CD3 expression was not a key driver of IS formation at low BiTE  
198 concentrations. In contrast, we found CD19 expression on target cells profoundly impacted IS  
199 formation (**Figure 3e**). These results were also predicted by the base model.

200 Our model predicted that cell density would also be critical to IS formation on a per-cell  
201 basis. Increasing total cell density (E+T) from 1 to 8 million per ml at an E:T ratio around 1:1  
202 drastically boosted IS formation from 3.1% to 15.3% at 20 ng/ml BiTE and 3.9% to 27.8% at

203 100 ng/ml BiTE (**Figure 3f**). IS formation was further increased with high CD3-expressing  
204 effector cells at high cell densities (**Figure 3g**).

205 The E:T ratio also played a pivotal role in IS formation. IS formation was optimized when the  
206 E:T ratio was around 1 (**Figure 3h**). Changing the E:T ratio led to variations in the fraction of  
207 effector and target cells involved in IS formation, as predicted by the model. With higher E:T  
208 ratios, a greater fraction of target cells but lower fraction of effector cells was involved in IS  
209 formation (**Figure 3i, Supplementary Figure S10**).

210 Overall, we found multiple factors to be influential to IS formation. The model reasonably  
211 recapitulated IS formation dynamics under various conditions (**Figure 3b-i, Supplementary**  
212 **Figure S10**). The goodness of model predictions is provided in **Supplementary Figure S11**.  
213 With good model predictability, we further investigated the influence of CD3 and CD19 binding  
214 affinities. Counterintuitively, higher affinities to CD3 resulted in lower predicted IS formation,  
215 perhaps due to higher induction of CD3 downregulation (**Supplementary Figure S12a**). Reduced  
216 IS formation at high CD3 affinities also resulted in a bell-shaped relationship (**Supplementary**  
217 **Figure S12b**). Notably, the approved BiTE, blinatumomab, has affinity for CD3 within the  
218 optimal range. In contrast, BiTEs with higher affinity to CD19 were predicted to enhance IS  
219 formation (**Supplementary Figure S12c and d**).

220

221 **IS variants were prevalent and well predicted by the base model**

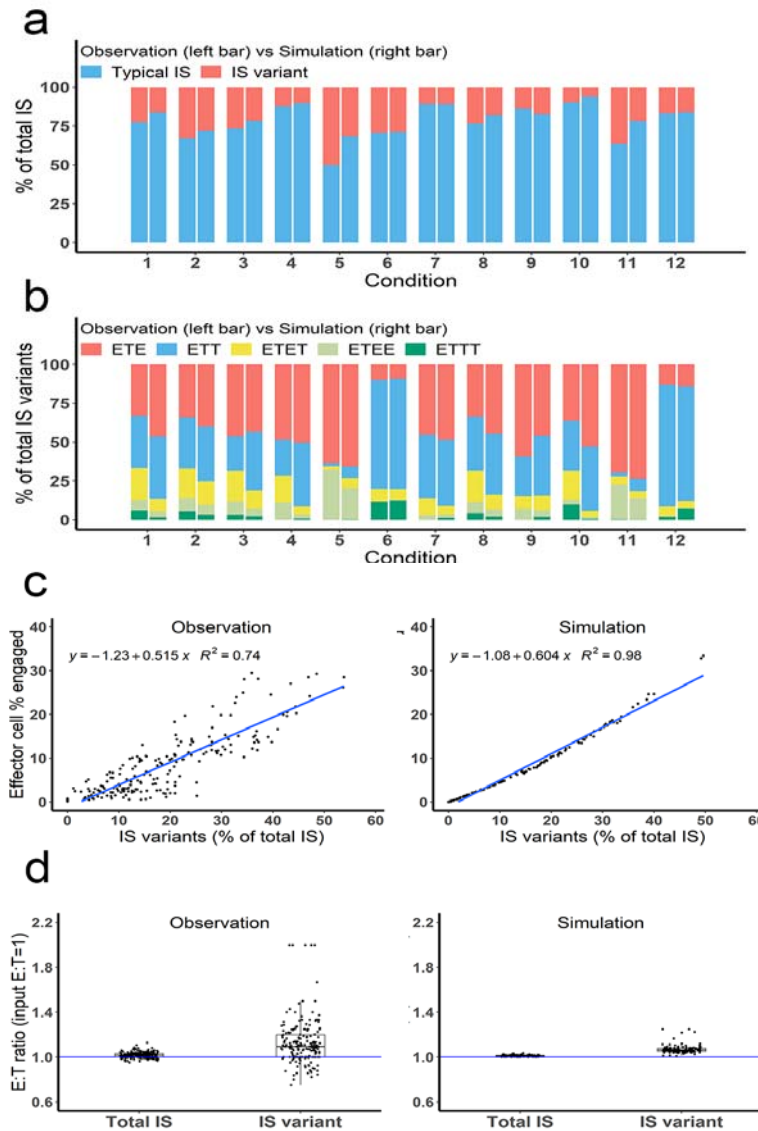

222 **Figure 4.** Multiple types of IS variants were observed and well predicted by the base model. In  
 223 total, six types of IS were quantified, including typical IS, ETE, ETT, ETET, ETEE, and ETTT.  
 224 **a**, The fraction of typical IS and variants under different conditions; **b**, The composition of IS  
 225 variants (ETE, ETT, ETET, ETEE, ETTT) under different conditions; **c**, The positive correlation  
 226 between the fraction of IS variants (% of total IS) and total IS formation (effector cell %  
 227 engaged). The formula and  $R^2$  of linear regressions are shown. **d**, The E:T ratios involved in total  
 228 IS and IS variants. Experimental setup: Condition 1, 2X, E:T(1), CD3(L), CD19(M), 100 ng/mL,  
 229 60 min; Condition 2, 4X, E:T(1), CD3(L), CD19(M), 100 ng/mL, 60 min; Condition 3, 2X,  
 230 E:T(1), CD3(H), CD19(M), 100 ng/mL, 60 min; Condition 4, 2X, E:T(1), CD3(L), CD19(L),  
 231 100 ng/mL, 60 min; Condition 5, 4X, E:T(6), CD3(L), CD19(M), 100 ng/mL, 60 min; Condition  
 232 6, 4X, E:T(0.17), CD3(L), CD19(M), 100 ng/mL, 60 min; Conditions 7-12 are the same as  
 233 Conditions 1-6, except with lower BiTE concentrations (20 ng/mL).  
 234  
 235

236 Many types of IS variants were observed in the experimental system. In total, six types of IS  
237 were quantified, including typical IS (ET), ETE, ETT, ETET, ETEE, and ETTT. IS variants with  
238 more than 4 cells were not analyzed in our study, nor included in the base model, due to their  
239 low abundance. The frequency of these variants was recorded and compared under each  
240 experimental condition.

241 Depending on the experimental condition, approximately 12-25% of IS observed were IS  
242 variants, although this increased up to 50% under condition 5 due to high cell density and BiTE  
243 concentration (**Figure 4a**). Among these IS variants, ETE and ETT were the most frequently  
244 observed, accounting for more than 60% of total IS variants formed under all conditions (**Figure**  
245 **4b**). Conditions 5 and 11 showed high ETE frequencies due to a high E:T ratio (6:1), while  
246 conditions 6 and 12 showed high ETT frequencies due to a low E:T ratio (1:5.8). The base model  
247 well predicted the relative fraction of each IS variant under all tested conditions (**Figure 4a and**  
248 **b**). In general, the fraction of IS variants increased with total IS abundance. The positive  
249 correlation between the fraction of IS variants and effector cells involved in IS was well  
250 predicted by the base model (**Figure 4c**)

251 The E:T ratios of IS variants from all co-incubation samples were pooled for comparison  
252 (**Figure 4d**). The median E:T ratio in total IS was about 1.0. When excluding typical IS, this  
253 ratio increased to 1.1 for the remaining IS variants, suggesting slightly more effector cells were  
254 involved in IS variant formation than target cells, in line with model predictions.

255

256 **The in-vitro model predicted antigen escape and organ reservoirs**

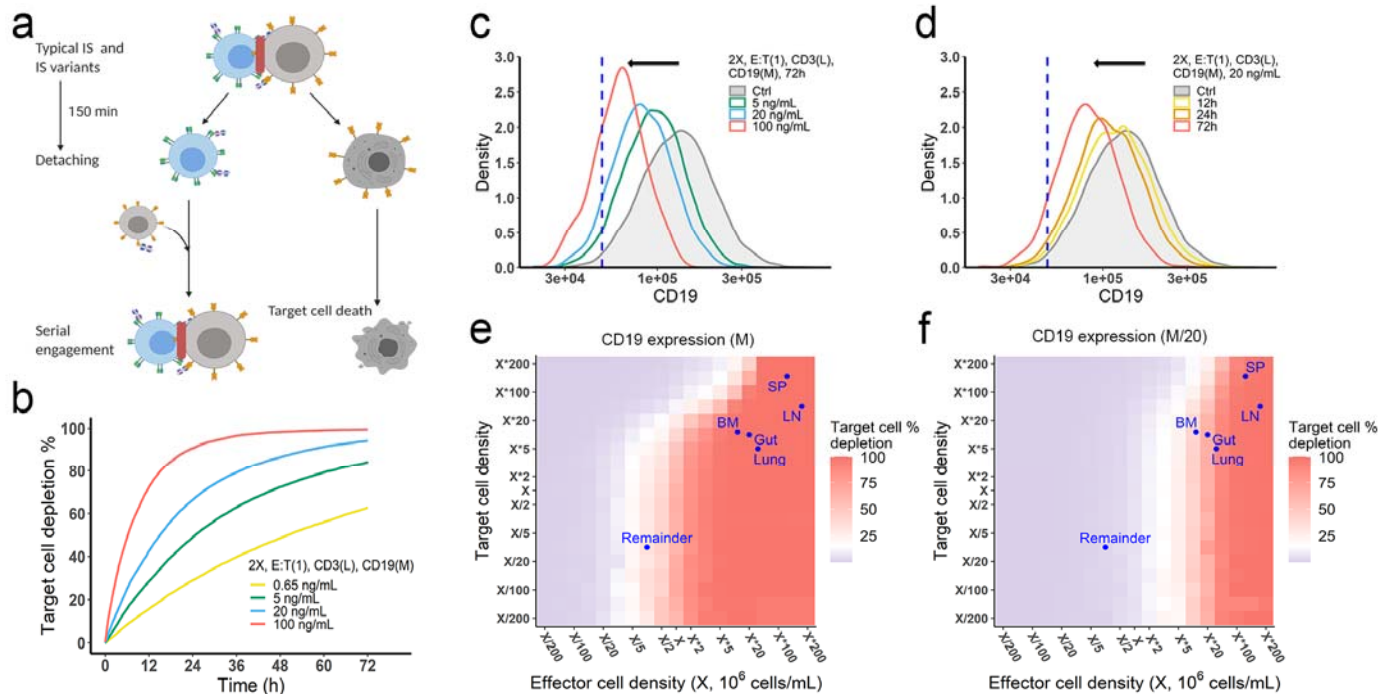

257 **Figure 5.** The in-vitro model predicted tumor evolution in time and space. **a**, Scheme of cell  
258 detachment and serial engagement in the in-vitro model; **b**, Long-term simulation (72h) of target  
259 cell depletion across drug concentrations; **c-d**, The effects of drug concentration (**c**) and  
260 incubation time (**d**) on CD19 expression. Dashed line, pre-defined threshold value of CD19  
261 expression for 15% target cell depletion within 72h (initial setup: 2X, E:T(1), CD3(L), 0.65  
262 ng/mL, 72h). Ctrl, initial distribution of CD19 expression in target cell population. **e-f**, the  
263 effects of effector and target cell density on target cell depletion (%). White, 15% target cell  
264 depletion. BM, bone marrow; LN, lymph nodes; SP, spleen; Remainder, all the rest of non-  
265 lymphoid organs. Initial setup: CD3(L), CD19(M) for (**e**), CD19 (M/20) for (**f**), 0.65 ng/mL, 72h.  
266

267 Effector T cells detach from IS and re-engage with other target cells in a process called serial  
268 cellular engagement. These effector T cells are also known as “serial killers” (*Fousek et al.,*  
269 *2021; Rogala et al., 2015*). We extended the base model to incorporate IS detachment and re-  
270 engagement (*Figure 5a*). The in-vitro model simulated IS formation and cellular cytotoxicity up  
271 to 72 hours. With serial engagement and killing, the fraction of target cell lysis increased  
272 considerably, even at low BiTE concentrations (*Figure 5b*).

273 Importantly, the in-vitro model predicted tumor evolution toward populations with low CD19  
274 expression (i.e., antigen escape). Approximately 10-20% of patients who relapse after  
275 blinatumomab treatment experience antigen escape, which decreases the efficacy of subsequent

276 anti-CD19 CAR-T cell therapy (*Braig et al., 2017; Pillai et al., 2019*). As shown in the model,  
277 tumor cells with lower CD19 expression had a lower chance of being engaged by effector cells  
278 and thus a higher probability of surviving (*Figure 5c and d*). The speed of evolution was  
279 predicted to increase at greater BiTE concentrations (*Figure 5c*) and accelerate over time  
280 (*Figure 5d*). The effect of E:T ratio, cell density, and antigen affinity on tumor evolution were  
281 also simulated (*Supplementary Figure S13*). Notably, greater IS formation led to more extensive  
282 evolution toward lower CD19-expressing cells.

283 The impact of cell density at clinically relevant BiTE concentrations was also interrogated  
284 (*Figure 5e and f, Supplementary Figure S14*). Notably, an increase of effector cell density  
285 resulted in higher fractions of target cell lysis at 72 hours. However, a higher density of target  
286 cells did not markedly diminish the fraction of target cells lysed at a given effector cell density,  
287 due to a compensatory increase in the probability of cell-cell encounter probability per effector  
288 cell. When target cell density was extremely high (e.g.,  $> 5 \times 10^6$ /mL with medium CD19  
289 expression at  $1.45 \times 10^5$ /cell in *Figure 5e*), lysis fraction decreased, as the low BiTE  
290 concentration may have become a limiting factor for IS formation. We used organ-specific  
291 effector and target cell abundance (*Supplementary Table S2*) to compare the predicted gradient  
292 of cell lysis across organs (*Figure 5e and f, Supplementary Figure S14*). Higher target cell lysis  
293 was predicted in lymph nodes and the spleen due to the abundance of effector cells in these  
294 organs. The bone marrow and all the rest of non-lymphoid organs (the remainder) showed  
295 restricted cell lysis primarily due to their relatively low abundance of effector cells (*Figure 5f*).  
296 The model also predicted that some organs like the bone marrow may become tumor cell  
297 sanctuary sites, providing space for tumor cell survival and adaptation, thereby increasing the  
298 likelihood of treatment resistance.

299

300 **The in-vivo model predicted clinical outcomes and tumor evolution across anatomical sites**

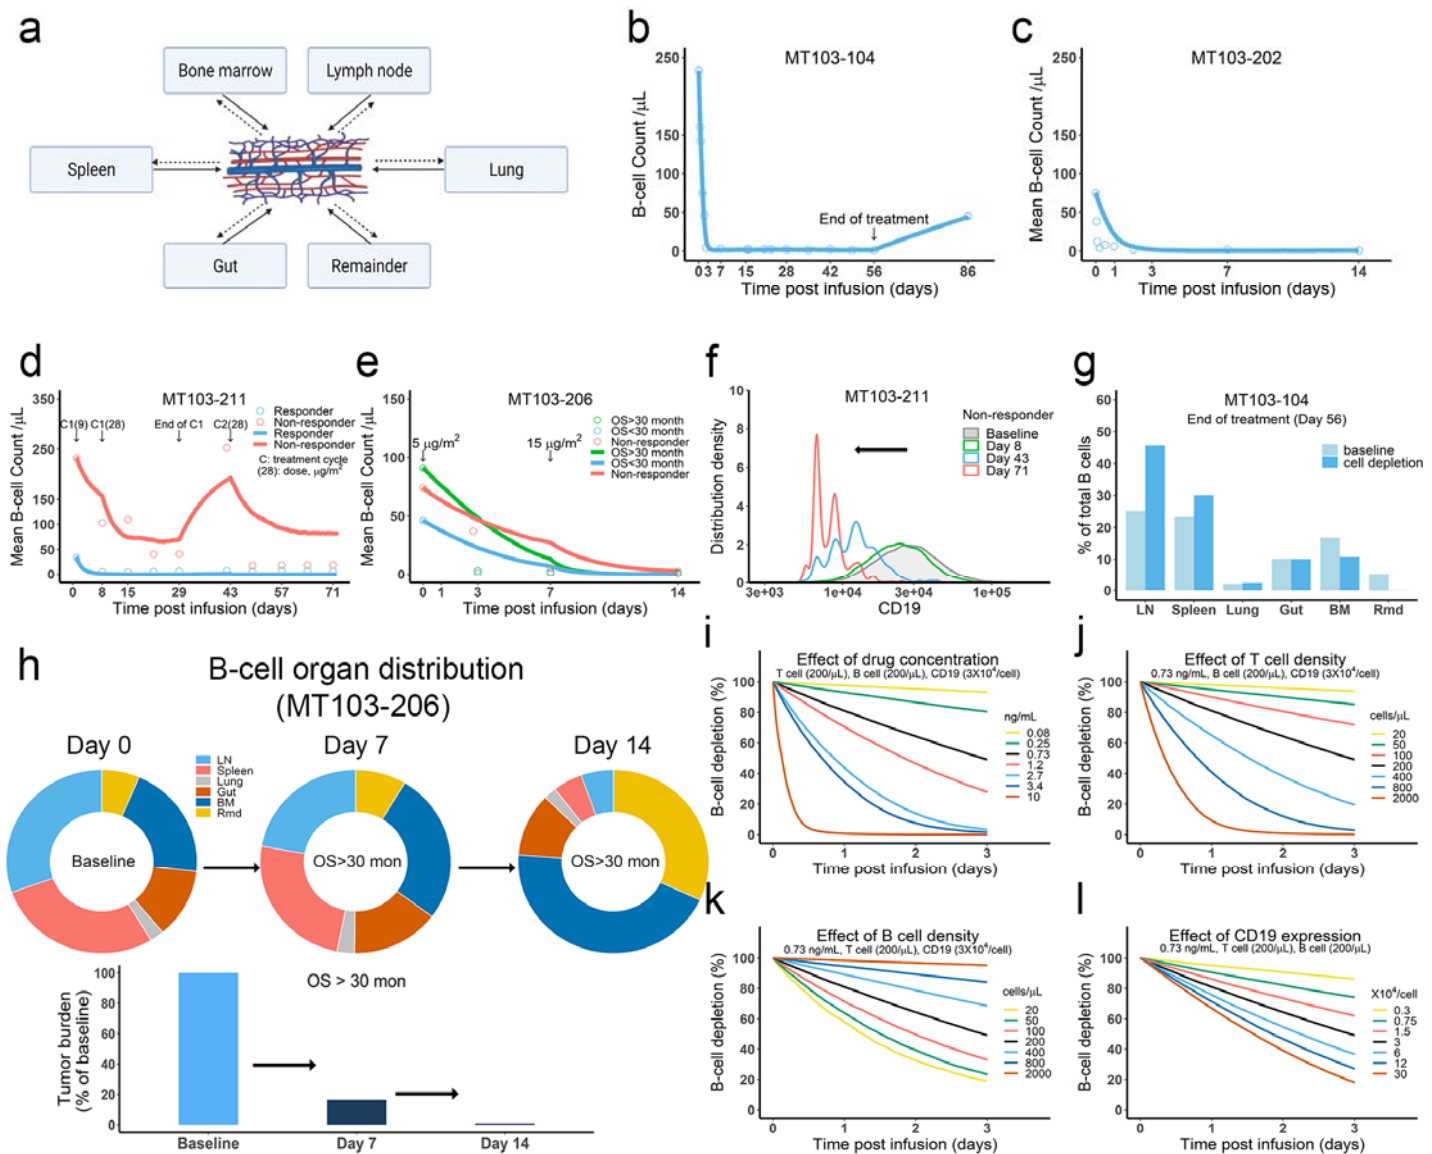

301 **Figure 6.** The in-vivo model predicted clinical pharmacodynamics and tumor evolution across  
 302 anatomical sites. **a**, Scheme of organ compartment and cell trafficking. Remainder, all the rest of  
 303 non-lymphoid organs; **b-e**, Observed and simulated patient B-cell profiles in blood. For trial  
 304 information and parameters, see Supplementary Table S2 and S3; **f**, Simulated CD19 evolution  
 305 in non-responder patients of trial MT103-211; **g**, Simulated cell lysis potency for each organ in  
 306 trial MT103-104; **h**, Simulated baseline (Day 0), and post-treatment (Day 7 and 14) B-cell organ  
 307 distribution in patients with OS > 30 month of MT103-206. Bar plot, simulated baseline and  
 308 post-treatment tumor burden; **i-l**, Sensitivity analyses for the impact of drug concentration (**i**), T  
 309 cell density (**j**), B cell density (**k**), and CD19 expression (**l**) on B-cell depletion. BM, bone  
 310 marrow; LN, lymph nodes; OS, overall survival; Rmd, remainder.

311

312



313 We developed the in-vivo model by defining IS formation dynamics in organs and cell  
314 trafficking across organ compartments (*Figure 6a, Supplementary Methods, Supplementary*  
315 *Table S2 and S3*). We used the model to simulate cell lysis in each organ and tumor-killing  
316 profiles throughout the body. Organ-specific cell lysis is highly dependent on relative IS  
317 formation dynamics and thus is a function of organ-specific effector (T cell) and target (B cell)  
318 populations, as well as BiTE exposure.

319 In the in-vivo model, the blood compartment serves merely a trafficking route and does not  
320 mediate IS formation and detachment (*Figure 6a*). This assumption was supported by our  
321 observation that negligible IS was formed under shear stress forces approximating those  
322 experienced under blood flow (*Supplementary Figure S15a*). Once formed, IS in the blood are  
323 unlikely to be broken through shear stress (*Supplementary Figure S15b*). Blood B cell levels  
324 reflected the systemic average. Although only 2% of lymphocytes are present in the blood, blood  
325 flow can transport about  $5 \times 10^{11}$  lymphocytes each day – comparable to the total number of  
326 lymphocytes in the body (*Westermann and Pabst, 1992*).

327 Patients show mixed responses to BiTE immunotherapy. Some patients exhibit complete  
328 tumor eradication while others have negligible responses. By adopting patient-specific  
329 parameters, such as BiTE dosing regimens and T cell proliferation profiles, the in-vivo model  
330 reasonably predicted B-cell depletion profiles in patients (*Bargou et al., 2008; Klinger et al.,*  
331 *2012; Zhu et al., 2016; Zhu et al., 2018; Zugmaier et al., 2015*) treated with blinatumomab in  
332 multiple clinical trials (*Figure 6b-e, Supplementary Table S2 and S3*). In the trials MT103-211  
333 and MT103-206, rapid accumulation of T cells in the blood was observed in responders but not  
334 non-responders (*Zhu et al., 2018; Zugmaier et al., 2015*). The model could account for these  
335 patient-specific T cell profiles and distinguish between responding and non-responding patients  
336 (*Figure 6d and e*).

337 Like the in-vitro model, the in-vivo model also predicted evolution toward low CD19-  
338 expressing cell populations over time, as shown in non-responders in MT103-211 (*Figure 6f*).  
339 This process is inevitable; the stronger the therapeutic pressure, the lower CD19-expression in  
340 the surviving cell population. The fraction of low CD19-expressing cells increases over time  
341 while the efficiency of tumor cell lysis decreases, leading to gradual loss of drug sensitivity.

342 We finally explored tumor evolution across anatomical sites and characterized the spatial  
343 gradients of cell lysis. The lymph node, spleen, and lung showed higher fractions of cell lysis  
344 than the gut, bone marrow, and remainder (**Figure 6g**). More than 45% of malignant cells in the  
345 system were lysed in the lymph nodes and around 30% were eradicated in the spleen. Lytic  
346 fractions were higher than their respective baseline levels in both organs, confirming enhanced  
347 tumor killing mediated by BiTE. In contrast, the lytic fraction in the bone marrow was lower  
348 under treatment than at baseline (**Figure 6g**), indicating poor tumor lysis efficiency. The  
349 anatomical differences in efficiency of cell lysis affected B-cell biodistribution after BiTE  
350 treatment in patients (**Figure 6h, Supplementary Figure S16**). The relative anatomical  
351 distribution of B cells also shifted considerably over time. In high responders (OS > 30 months,  
352 MT103-206), over 99% of B cells were eradicated, particularly in organs with high predicted  
353 lysis (lymph nodes and spleen). In the bone marrow, a small fraction of B cells survived that  
354 exhibited considerably lower CD19 expression than the original cell population. Unfortunately,  
355 the surviving cell populations gradually repopulated the bone marrow, leading to B-cell rebound  
356 and eventually patient relapse. By contrast, non-responders had a lower fraction of B cell lysis by  
357 day 14, with B cell distribution profiles remaining similar to the baseline (**Supplementary Figure**  
358 **S16**).

359 Sensitivity analyses confirmed that baseline tumor burden, drug concentration, cytotoxic T  
360 cell infiltration, and CD19 expression were critical to patient response (**Figure 6i-l**).

361

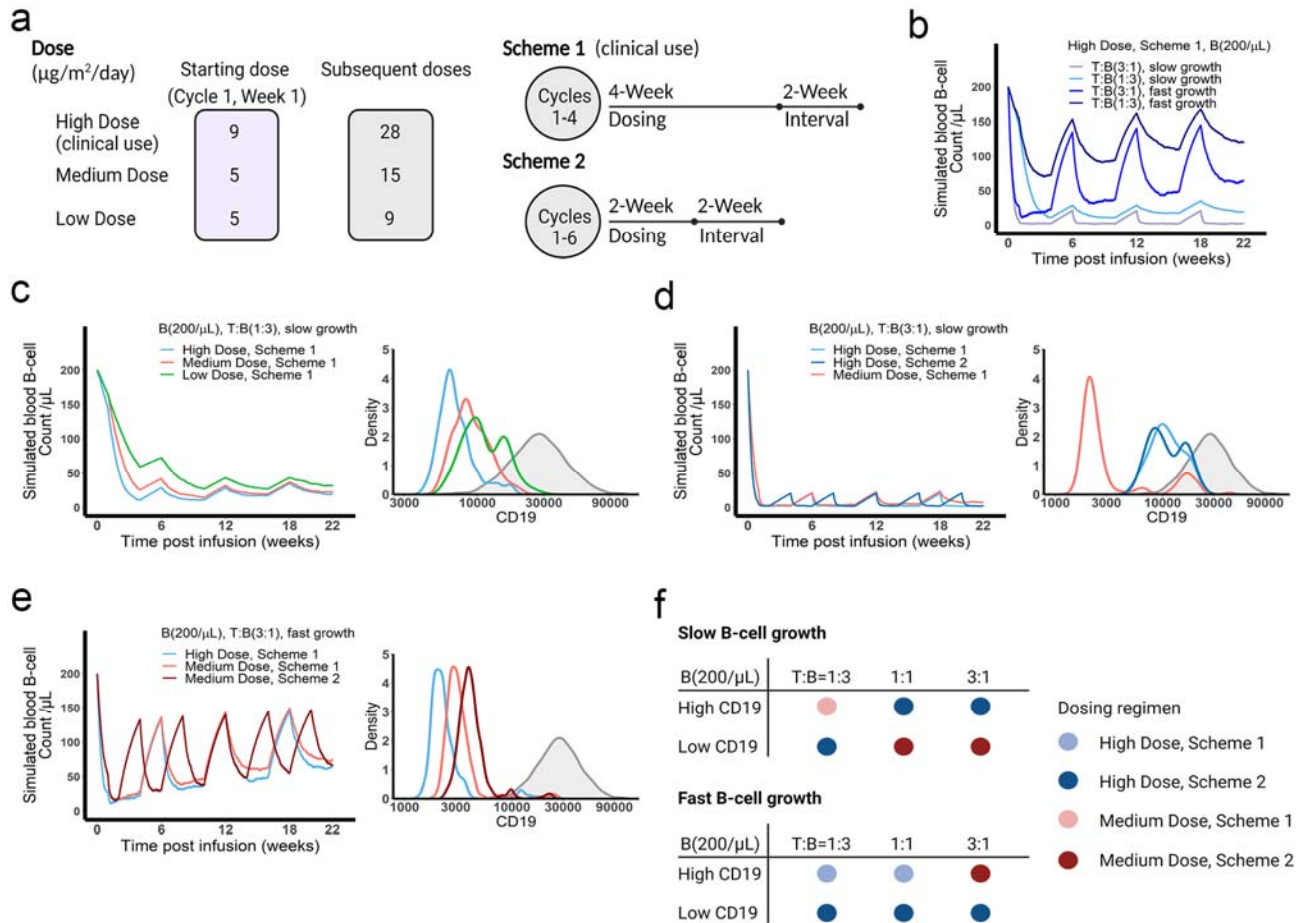

## 362 The in-vivo model predicted optimal dosing regimens for blinatumomab

363 **Figure 7.** The dose and regimen of BiTE strongly influenced tumor control and CD19 evolution.  
 364 **a**, Three doses (high, medium, and low) and regimens (scheme 1 and 2) were evaluated in the  
 365 simulations. Starting doses were applied in the first week of cycle 1 only. The high dose with  
 366 scheme 1 is the clinically approved dose and regimen of blinatumomab for the treatment of B-  
 367 cell acute lymphoblastic leukemia; **b**, Simulated blood B-cell profiles under different T:B ratios  
 368 and B-cell growth rates in 22-week treatment; **c-e**, Different dose levels and schemes were  
 369 explored in respective conditions. Simulated blood B-cell profiles and CD19 evolution were  
 370 shown. Grey line and shaded regions represent CD19 baseline expression; **f**, The favorable  
 371 dosing regimen under each condition. The favorable dosing regimen was determined by  
 372 comparing B-cell killing efficacy, CD19 evolution, and total dose, in this order of priority,  
 373 respectively. B (200/ $\mu\text{L}$ ), baseline B cell density in blood is assumed to 200/ $\mu\text{L}$ ; High (**b-e**) and  
 374 low CD19 expressions were the mean level of CD19 expression per B cell and set as  $3 \times 10^4$  and  
 375  $1 \times 10^4$ , respectively; High growth and low growth of B cells were set to 0.071/day and  
 376 0.0071/day.

377

378 We applied the in-vivo model to simulate B cell-killing efficacy and CD19 evolution during  
379 blinatumomab treatment and compared different doses and regimens (*Figure 7a*). The initial  
380 plasma B cell abundance was assumed to be 200 cells/ $\mu$ L, with varying levels of growth rates.  
381 Under the approved dose (i.e., the high dose) and scheme 1, tumor-killing profiles were highly  
382 dependent upon tumor growth rate and baseline T cell abundance (*Figure 7b*). Tumors gradually  
383 accumulated resistance to treatment, especially fast-growing tumors. For slow-growing tumors  
384 with low T cell baseline, the medium dose showed comparable tumor-killing effect but resulted  
385 in less CD19 evolution than the high dose (*Figure 7c*). In contrast, for slow-growing tumors with  
386 high T cell abundance, the high dose exhibited almost complete tumor control and much less  
387 CD19 loss than the medium dose (*Figure 7d*). The high dose showed similar efficacy at two  
388 dosing schemes, but scheme 2 had fewer total doses. For fast-growing tumors, CD19 loss was  
389 significant, regardless of dose and regimen (*Figure 7e*). The medium dose at scheme 2 elicited  
390 less CD19 loss and better tumor control than scheme 1. *Figure 7f* summarized favorable dosing  
391 regimen under each condition. We found that the approved dose or regimen was suboptimal for  
392 almost all slow-growing tumors; rather, the medium dose or dosing regimen 2 could reach  
393 similar efficacy with slower CD19 evolution. The high dose was required for almost all fast-  
394 growing tumors, with the only exception being patients with high T cell abundance at baseline  
395 who received more benefit from the medium dose at scheme 2. Overall, our in-vivo model,  
396 through defining IS formation dynamics across anatomical sites in the system, could predict  
397 BiTE pharmacodynamics and changes in CD19 expression over time, and identify optimal  
398 dosing strategies based on baseline tumor characteristics.

399

## 400 **Discussion**

401  
402 The clinical efficacy of BiTE immunotherapy remains suboptimal, with many of the patients  
403 who initially respond eventually experiencing disease relapse. Understanding IS formation, a  
404 crucial step in many T cell immunotherapy's mechanism of action, can yield insights into the  
405 pharmacodynamics of BiTEs and subsequent treatment resistance. This study used an  
406 experimentally and theoretically integrated approach to examine IS formation dynamics induced  
407 by BiTEs on a population level. The abundance of IS caused by BiTEs was quantified using  
408 imaging flow cytometry, and the dynamics of IS formation were simulated with theoretical  
409 models. By defining IS formation as a spatiotemporal orchestration of molecular and cellular  
410 interactions, our theoretical models recapitulated the experimental data well. Notably, the models  
411 predicted antigen escape to be a common mechanism of resistance to BiTE immunotherapy.  
412 Tumor cells with low antigen expression accumulated over time, leading to treatment resistance  
413 and eventual disease relapse. The anatomical heterogeneity of T cell infiltration and E:T ratios  
414 across organs also conferred heterogeneous degrees of cell lysis. In particular, a subset of tumor  
415 cells in “sanctuary sites”, such as the bone marrow, may be relatively protected from effector cell  
416 lysis and fuel tumor evolution and disease relapse.

417 IS formation induced by BiTEs is determined mainly by two cell-scale interaction processes:  
418 cell-cell encounter and adhesion. Cell-cell encounter is the first, and in many instances, the rate  
419 limiting step to IS formation. For simplicity, the models assume random cell motion without  
420 consideration for directed or chemotactic movement (*Celli et al., 2012*). Cell density is another  
421 critical factor; cell encounter probability could become the rate-limiting step for IS formation  
422 when the target cell density is sufficiently low that effector cells have little chance of  
423 encountering target cells. This could be particularly challenging for patients with minimal  
424 residual disease. When effector cell density is low, as in the bone marrow, tumor cells have a  
425 higher chance of surviving for long enough to develop immune evasion mechanisms, leading to  
426 treatment resistance. On the other hand, when target cell density is extremely high within an  
427 organ, target cell lysis may be compromised by insufficient antibody concentrations at clinically  
428 utilized doses (*Figure 5e and f*). This is consistent with clinical observations that the efficacy of  
429 blinatumomab is much higher in patients with relatively low tumor burden (*Topp et al., 2015;*  
430 *Viardot and Bargou, 2018*).

431 The molecular crosslinking between BiTEs and antigens affects the probability of cell-cell  
432 adhesion upon encounter. Drug concentration, binding affinity, and antigen expression are  
433 critical determinants of this process. Many studies have reported a bell-shaped drug  
434 concentration-response profile for BiTE immunotherapy (*Betts et al., 2019; Douglass et al.,*  
435 *2013; Schropp et al., 2019; Vyver et al., 2020*), with the primary mechanism underlying the  
436 phenomenon being the oversaturation of T cell receptors at high BiTE concentrations. The  
437 theoretical model reported herein also predicts a bell-shape concentration – IS curve, but the  
438 predicted curve peaked at higher antibody concentrations if not including the possibility of CD3  
439 down-regulation by effector cells upon antibody engagement. Our model also suggested that  
440 blinatumomab has affinity for CD3 within the optimal range of  $10^{-7} - 10^{-6}$  M (*Supplementary*  
441 *Figure S12a*).

442 We explored the different effects of CD19 on cellular and molecular processes. Total CD19  
443 in the system was jointly influenced by CD19 expression on membrane and target cell density.  
444 CD19 expression influenced cell lysis to a similar extent as target cell density when both factors  
445 were low (*Supplementary Figure S17a*). However, an increase of CD19 expression beyond  
446  $1.45 \times 10^4$  receptors/cell did not further improve cell lysis. In contrast, target cell densities seemed  
447 to have a bidirectional effect on cell lysis. At low levels, escalating cell densities enhanced the  
448 probability of cell-cell encounter, while at high target cell densities, BiTE concentrations were  
449 insufficient to mediate meaningful IS formation, resulting in fewer cell-cell adhesion events and  
450 less cell lysis (*Supplementary Figure S17a and b*). This is consistent with clinical simulations  
451 (*Supplementary Figure S17c*). The different roles of CD19 expression and target cell density  
452 highlight the importance of cellular-scale interactions to IS formation that cannot be  
453 appropriately described by molecular crosslinking alone. Because of these cellular processes, our  
454 theoretical models fundamentally differ from previous BiTE pharmacodynamics models that  
455 consider molecular crosslinking only (*Betts et al., 2019; Jiang et al., 2018; Schropp et al., 2019;*  
456 *Song et al., 2021*). In our models, molecular crosslinking caused by BiTE, i.e., ternary complex  
457 formation, drove cell-cell adhesion events, whereas cell-cell encounters were modeled as an  
458 independent process.

459 Heterogeneity of CD19 antigen expression is a critical factor to BiTE-induced IS formation.  
460 Target cells with lower antigen expression had a lower probability of adhesion to T cells and thus

461 a greater chance of survival. The theoretical models suggest that tumor evolution is an inevitable  
462 consequence to treatment, and that the stronger the therapeutic selection pressure, the more  
463 tumor cell populations evolve away from their pretreatment phenotype. Ultimately, the surviving  
464 tumor cells shift toward a low antigen expression population in a process known as antigen  
465 escape. Antigen escape is a common mechanism of resistance to T cell-based immunotherapy  
466 (*Aldoss et al., 2017; Topp et al., 2014*); however, the speed of tumor evolution toward antigen  
467 escape remains hard to predict. Through defining the formation of IS, our models show a proof  
468 of concept for predicting the trajectory of antigen escape based on baseline antigen expression.

469 Non-uniform tumor lysis effect across organs represents another barrier for therapy. Provided  
470 an anatomical space with few effector cells, tumor cells might use the bone marrow as a  
471 sanctuary site within which IS formation is infrequent. Insufficient selective pressure from  
472 effector cells might allow the regeneration of a newly resistant population of tumors cells that  
473 then repopulate other organs and accelerate systemic disease progression. This speculation is  
474 consistent with the clinical observation that patients under BiTE treatment often have relapses  
475 first detected in the bone marrow (*Locatelli et al., 2022*).

476 We used the in-vivo model to compare different doses and schedules of blinatumomab. We  
477 found that tumor baseline characteristics, including tumor growth rate, CD19 expression, and T  
478 cell abundance, greatly influenced tumor-killing pharmacodynamics, tumor evolution, and  
479 consequentially, the ideal dosing regimen. The clinically approved dose and regimen might  
480 become suboptimal for most slow-growing tumors. The medium dose or mild regimen could  
481 maintain an optimal balance between tumor-killing and evolutionary pressure (*Figure 7f*).  
482 However, it was not always the case that higher dose amounts (i.e., higher therapeutic pressure)  
483 resulted in faster tumor evolution. For slow-growing tumors with sufficient T cells (*Figure 7d*  
484 *and f*), the high dose with regimens 1 or 2 could cause nearly complete tumor eradication,  
485 thereby resulting negligible selection and limiting the total population size remaining for  
486 evolution. Faster and greater reductions in population size conferred by high doses might  
487 therefore reduce the chance of evolutionary rescue for slow-growing tumors.

488 In conclusion, our study investigated the dynamics of IS formation under various conditions  
489 mimicking the heterogeneous nature of tumor microenvironments. To our knowledge, these  
490 theoretical models are the first to quantify the entire BiTE-induced IS formation process. The

491 models reveal trajectories of tumor evolution through antigen escape across anatomical sites and  
492 suggested dosing regimens that could confer tumor control in light of treatment-induced disease  
493 evolution. This work shows substantial implications for T cell-based immunotherapies.  
494



## 495 **Materials and Methods**

496

### 497 **Cell lines**

498 Jurkat (Clone E6-1) and Raji cells were obtained from ATCC and maintained in RPMI1640  
499 supplemented with 10–20% fetal bovine serum (FBS) and 1% penicillin-streptomycin. Cell lines  
500 were routinely tested to avoid mycoplasma contamination.

### 501 **Cell sorting and antigen expression quantification**

502 Cell populations with high (H), medium (M) and low (L) antigen expression were sorted based  
503 on natural expression levels, without any genetic engineering. PE-anti-CD3 and PE-anti-CD19  
504 (BD Biosciences, San Jose, CA) were used as staining antibodies and BD FACSAria II was used  
505 to perform cell sorting. Surface expression of CD3 and CD19 were quantitatively determined by  
506 Quantum™ MESF beads (Bangs laboratories, Fishers, IN) and BD LSR II flow cytometry  
507 (*Supplementary Figure S1*).

### 508 **Cell co-incubation and imaging flow cytometry**

509 Effector cell (E, Jurkat), target cell (T, Raji), and anti-hCD19-CD3 BiTE (BioVision, Milpitas,  
510 CA) were well mixed and co-incubated in 1 mL medium at 37 °C. CD3 or CD19 expression,  
511 drug concentration, cell density, E:T ratio, and duration of co-incubation varied as initial setups.  
512 After co-incubation, effector cell, target cell, actin, and nucleus were stained by FITC-anti-CD7  
513 (eBiosciences, San Diego, CA), PE-anti-CD20 (BD Biosciences, San Jose, CA), AF647-anti-  
514 phalloidin (Thermo-Fisher, Waltham, MA) and DAPI, respectively. Staining for surface and  
515 intracellular markers was performed as described previously (*Liu et al., 2019*). Samples were  
516 analyzed using Amnis ImageStream MKII (Luminex, Austin, TX). The frequency of IS was  
517 quantified using IDEAS (Luminex). The gating strategy is summarized in *Supplementary*  
518 *Figure S2*.

### 519 **Cell co-incubation under shear stress**

520 To mimic the shear stress in blood circulation, effector cell, target cell, and BiTE were well  
521 mixed in a circular pipe (internal diameter: 1.6 mm) and co-cultured (37 °C) at a certain flow  
522 velocity driven by a roller pump (Masterflex, Vernon Hills, IL). Flow velocities were adjusted to  
523 produce varying wall shear stresses, equivalent to those in the vein (1-6 dyn/cm<sup>2</sup>), artery (10-24,

524 dyn/cm<sup>2</sup>) and capillary (20-40 dyn/cm<sup>2</sup>) (*Kamiya et al., 1984; Papaioannou and Stefanadis,*  
525 *2005; Sebastian and Dittrich, 2018*). After co-culture, sample staining and analysis were the  
526 same as previously described.

527 **Modeling and simulation (see *Supplementary Methods*)**

528

529 **Funding**

530 National Institute of Health, R35GM119661

531 **Data Availability**

532 The data generated in this study are available upon request from the corresponding author.

533 **Acknowledgements**

534 We thank Amgen Inc. for kindly sharing blinatumomab to support our pilot study.

535 **Author Contributions:**

536 Can Liu, Conceptualization, Formal analysis, Investigation, Methodology, Writing - original  
537 draft, Writing - review and editing; Jiawei Zhou, Investigation, Methodology, Writing - review  
538 and editing; Stephan Kudlacek, Methodology, Writing - review and editing; Timothy Qi, Writing  
539 - review and editing; Tyler Dunlap, Writing - review and editing; Yanguang Cao,  
540 Conceptualization, Formal analysis, Investigation, Methodology, Supervision, Funding  
541 acquisition, Writing - original draft, Writing - review and editing;

542 **Competing Interests:**

543 Timothy Qi is a contractor for Hatteras Venture Partners and Yanguang Cao is a consultant for  
544 Janssen Research & Development. No further competing interest was declared by other authors.

545

## 546 **References**

- 547 **Aldoss I**, Song J, Stiller T, Nguyen T, Palmer J, O'Donnell M, Stein AS, Marcucci G, Forman S,  
548 Pullarkat V. 2017. Correlates of resistance and relapse during blinatumomab therapy for  
549 relapsed/refractory acute lymphoblastic leukemia. *American Journal of Hematology* **92**:858-865.  
550 [DOI: 10.1002/ajh.24783](#), [PMID: 28494518](#)
- 551 **Bargou R**, Leo E, Zugmaier G, Klinger M, Goebeler M, Knop S, Noppeney R, Viardot A, Hess  
552 G, Schuler M, Einsele H, Brandl C, Wolf A, Kirchinger P, Klappers P, Schmidt M, Riethmüller  
553 G, Reinhardt C, Baeuerle PA, Kufer P. 2008. Tumor regression in cancer patients by very low  
554 doses of a T cell-engaging antibody. *Science* **321**:974-977. [DOI: 10.1126/science.1158545](#),  
555 [PMID: 18703743](#)
- 556 **Bell GI**. 1978. Models for the specific adhesion of cells to cells. *Science* **200**:618-627. [DOI:](#)  
557 [10.1126/science.347575](#), [PMID: 347575](#)
- 558 **Betts A**, Haddish-Berhane N, Shah DK, van der Graaf PH, Barletta F, King L, Clark T,  
559 Kamperschroer C, Root A, Hooper A, Chen X. 2019. A translational quantitative systems  
560 pharmacology model for CD3 bispecific molecules: application to quantify T cell-mediated  
561 tumor cell killing by P-Cadherin LP DART. *AAPS Journal* **21**:66. [DOI: 10.1208/s12248-019-](#)  
562 [0332-z](#), [PMID: 31119428](#)
- 563 **Braig F**, Brandt A, Goebeler M, Tony HP, Kurze AK, Nollau P, Bumm T, Böttcher S, Bargou  
564 RC, Binder M. 2017. Resistance to anti-CD19/CD3 BiTE in acute lymphoblastic leukemia may  
565 be mediated by disrupted CD19 membrane trafficking. *Blood* **129**:100-104. [DOI: 10.1182/blood-](#)  
566 [2016-05-718395](#), [PMID: 27784674](#)
- 567 **Celli S**, Day M, Muller AJ, Molina-Paris C, Lythe G, Bousso P. 2012. How many dendritic cells  
568 are required to initiate a T-cell response? *Blood* **120**:3945-3948. [DOI: 10.1182/blood-2012-01-](#)  
569 [408260](#), [PMID: 22995897](#)
- 570 **Delon J**, Germain RN. 2000. Information transfer at the immunological synapse. *Current*  
571 *Biology* **10**:R923-933. [DOI: 10.1016/s0960-9822\(00\)00870-8](#), [PMID: 11137031](#)
- 572 **Douglass EF**, Miller CJ, Sparer G, Shapiro H, Spiegel DA. 2013. A comprehensive  
573 mathematical model for three-body binding equilibria. *Journal of the American Chemical Society*  
574 **135**:6092-6099. [DOI: 10.1021/ja311795d](#), [PMID: 23544844](#)
- 575 **Dustin ML**, Cooper JA. 2000. The immunological synapse and the actin cytoskeleton: molecular  
576 hardware for T cell signaling. *Nature Immunology* **1**:23-29. [DOI: 10.1038/76877](#), [PMID:](#)  
577 [10881170](#)
- 578 **Finetti F**, Baldari CT. 2018. The immunological synapse as a pharmacological target.  
579 *Pharmacological Research* **134**:118-133. [DOI: 10.1016/j.phrs.2018.06.009](#), [PMID: 29898412](#)
- 580 **Fousek K**, Watanabe J, Joseph SK, George A, An X, Byrd TT, Morris JS, Luong A, Martínez-  
581 Paniagua MA, Sanber K, Navai SA, Gad AZ, Salsman VS, Mathew PR, Kim HN, Wagner DL,  
582 Brunetti L, Jang A, Baker ML, Varadarajan N, Hegde M, Kim YM, Heisterkamp N, Abdel-Azim

- 583 H, Ahmed N. 2021. CAR T-cells that target acute B-lineage leukemia irrespective of CD19  
584 expression. *Leukemia* **35**:75-89. DOI: [10.1038/s41375-020-0792-2](https://doi.org/10.1038/s41375-020-0792-2), PMID: [32205861](https://pubmed.ncbi.nlm.nih.gov/32205861/)
- 585 **Jiang X**, Chen X, Carpenter TJ, Wang J, Zhou R, Davis HM, Heald DL, Wang W. 2018.  
586 Development of a target cell-biologics-effector cell (TBE) complex-based cell killing model to  
587 characterize target cell depletion by T cell redirecting bispecific agents. *MAbs* **10**:876-889. DOI:  
588 [10.1080/19420862.2018.1480299](https://doi.org/10.1080/19420862.2018.1480299), PMID: [29985776](https://pubmed.ncbi.nlm.nih.gov/29985776/)
- 589 **Kamiya A**, Bukhari R, Togawa T. 1984. Adaptive regulation of wall shear stress optimizing  
590 vascular tree function. *Bulletin of Mathematical Biology* **46**:127-137. DOI:  
591 [10.1007/BF02463726](https://doi.org/10.1007/BF02463726), PMID: [6713148](https://pubmed.ncbi.nlm.nih.gov/6713148/)
- 592 **Klinger M**, Brandl C, Zugmaier G, Hijazi Y, Bargou RC, Topp MS, Gökbüget N, Neumann S,  
593 Goebeler M, Viardot A, Stelljes M, Brüggemann M, Hoelzer D, Degenhard E, Nagorsen D,  
594 Baeuerle PA, Wolf A, Kufer P. 2012. Immunopharmacologic response of patients with B-lineage  
595 acute lymphoblastic leukemia to continuous infusion of T cell-engaging CD19/CD3-bispecific  
596 BiTE antibody blinatumomab. *Blood* **119**:6226-6233. DOI: [10.1182/blood-2012-01-400515](https://doi.org/10.1182/blood-2012-01-400515),  
597 PMID: [22592608](https://pubmed.ncbi.nlm.nih.gov/22592608/)
- 598 **Liu C**, He H, Li X, Su MA, Cao Y. 2019. Dynamic metrics-based biomarkers to predict  
599 responders to anti-PD-1 immunotherapy. *British Journal of Cancer* **120**:346-355. DOI:  
600 [10.1038/s41416-018-0363-8](https://doi.org/10.1038/s41416-018-0363-8), PMID: [30587849](https://pubmed.ncbi.nlm.nih.gov/30587849/)
- 601 **Locatelli F**, Zugmaier G, Mergen N, Bader P, Jeha S, Schlegel PG, Bourquin JP, Handgretinger  
602 R, Brethon B, Rössig C, Kormany WN, Viswagnachar P, Chen-Santel C. 2022. Blinatumomab in  
603 pediatric relapsed/refractory B-cell acute lymphoblastic leukemia: RIALTO expanded access  
604 study final analysis. *Blood Advances* **6**:1004-1014. DOI: [10.1182/bloodadvances.2021005579](https://doi.org/10.1182/bloodadvances.2021005579),  
605 PMID: [34979020](https://pubmed.ncbi.nlm.nih.gov/34979020/)
- 606 **Nagorsen D**, Kufer P, Baeuerle PA, Bargou R. 2012. Blinatumomab: a historical perspective.  
607 *Pharmacology & Therapeutics* **136**:334-342. DOI: [10.1016/j.pharmthera.2012.07.013](https://doi.org/10.1016/j.pharmthera.2012.07.013), PMID:  
608 [22940266](https://pubmed.ncbi.nlm.nih.gov/22940266/)
- 609 **Papaioannou TG**, Stefanadis C. 2005. Vascular wall shear stress: basic principles and methods.  
610 *Hellenic Journal of Cardiology* **46**:9-15. PMID: [15807389](https://pubmed.ncbi.nlm.nih.gov/15807389/)
- 611 **Pillai V**, Muralidharan K, Meng W, Bagashev A, Oldridge DA, Rosenthal J, Arnam JV,  
612 Melenhorst JJ, Mohan D, DiNofia AM, Luo M, Cherian S, Fromm JR, Wertheim G, Thomas-  
613 Tikhonenko A, Paessler M, June CH, Prak ETL, Bhoj VG, Grupp SA, Maude SL, Rheingold SR.  
614 2019. CAR T-cell therapy is effective for CD19-dim B-lymphoblastic leukemia but is impacted  
615 by prior blinatumomab therapy. *Blood Advances* **3**:3539-3549. DOI:  
616 [10.1182/bloodadvances.2019000692](https://doi.org/10.1182/bloodadvances.2019000692), PMID: [31738832](https://pubmed.ncbi.nlm.nih.gov/31738832/)
- 617 **Roda-Navarro P**, Álvarez-Vallina L. 2020. Understanding the spatial topology of artificial  
618 immunological synapses assembled in T cell-redirecting strategies: a major issue in cancer

- 619 immunotherapy. *Frontiers in Cell and Developmental Biology* **7**:370. DOI:  
620 [10.3389/fcell.2019.00370](https://doi.org/10.3389/fcell.2019.00370), PMID: 31998721
- 621 **Rogala B**, Freyer CW, Ontiveros EP, Griffiths EA, Wang ES, Wetzler M. 2015. Blinatumomab:  
622 enlisting serial killer T-cells in the war against hematologic malignancies. *Expert Opinion on*  
623 *Biological Therapy* **15**:895-908. DOI: [10.1517/14712598.2015.1041912](https://doi.org/10.1517/14712598.2015.1041912), PMID: 25985814
- 624 **Schropp J**, Khot A, Shah DK, Koch G. 2019. Target-mediated drug disposition model for  
625 bispecific antibodies: properties, approximation, and optimal dosing strategy. *CPT:*  
626 *Pharmacometrics & Systems Pharmacology* **8**:177-187. DOI: [10.1002/psp4.12369](https://doi.org/10.1002/psp4.12369), PMID:  
627 [30480383](https://pubmed.ncbi.nlm.nih.gov/30480383/)
- 628 **Sebastian B**, Dittrich PS. 2018. Microfluidics to mimic blood flow in health and disease. *Annual*  
629 *Review of Fluid Mechanics* **50**:483-504. DOI: [10.1146/annurev-fluid-010816-060246](https://doi.org/10.1146/annurev-fluid-010816-060246)
- 630 **Song L**, Xue J, Zhang J, Li S, Liu D, Zhou T. 2021. Mechanistic prediction of first-in-human  
631 dose for bispecific CD3/EpCAM T-cell engager antibody M701, using an integrated PK/PD  
632 modeling method. *European Journal of Pharmaceutical Sciences* **158**:105584. DOI:  
633 [10.1016/j.ejps.2020.105584](https://doi.org/10.1016/j.ejps.2020.105584), PMID: [33039565](https://pubmed.ncbi.nlm.nih.gov/33039565/)
- 634 **Thakur A**, Huang M, Lum LG. 2018. Bispecific antibody based therapeutics: strengths and  
635 challenges. *Blood Reviews* **32**:339-347. DOI: [10.1016/j.blre.2018.02.004](https://doi.org/10.1016/j.blre.2018.02.004), PMID: [29482895](https://pubmed.ncbi.nlm.nih.gov/29482895/)
- 636 **Topp MS**, Gökbuget N, Zugmaier G, Klappers P, Stelljes M, Neumann S, Viardot A, Marks R,  
637 Diedrich H, Faul C, Reichle A, Horst HA, Brüggemann M, Wessiepe D, Holland C, Alekar S,  
638 Mergen N, Einsele H, Hoelzer D, Bargou RC. 2014. Phase II trial of the anti-CD19 bispecific T  
639 cell-engager blinatumomab shows hematologic and molecular remissions in patients with  
640 relapsed or refractory B-precursor acute lymphoblastic leukemia. *Journal of Clinical Oncology*  
641 **32**:4134-4140. DOI: [10.1200/JCO.2014.56.3247](https://doi.org/10.1200/JCO.2014.56.3247), PMID: [25385737](https://pubmed.ncbi.nlm.nih.gov/25385737/)
- 642 **Topp MS**, Gökbuget N, Stein AS, Zugmaier G, O'Brien S, Bargou RC, Dombret H, Fielding  
643 AK, Heffner L, Larson RA, Neumann S, Foà R, Litzow M, Ribera JM, Rambaldi A, Schiller G,  
644 Brüggemann M, Horst HA, Holland C, Jia C, Maniar T, Huber B, Nagorsen D, Forman SJ,  
645 Kantarjian HM. 2015. Safety and activity of blinatumomab for adult patients with relapsed or  
646 refractory B-precursor acute lymphoblastic leukaemia: a multicentre, single-arm, phase 2 study.  
647 *Lancet Oncology* **16**:57-66. DOI: [10.1016/S1470-2045\(14\)71170-2](https://doi.org/10.1016/S1470-2045(14)71170-2), PMID: [25524800](https://pubmed.ncbi.nlm.nih.gov/25524800/)
- 648 **Viardot A**, Bargou R. 2018. Bispecific antibodies in haematological malignancies. *Cancer*  
649 *Treatment Reviews* **65**:87-95. DOI: [10.1016/j.ctrv.2018.04.002](https://doi.org/10.1016/j.ctrv.2018.04.002), PMID: [29635163](https://pubmed.ncbi.nlm.nih.gov/29635163/)
- 650 **Vyver AJ**, Weinzierl T, Eigenmann MJ, Frances N, Herter S, Buser RB, Somandin J,  
651 Diggelmann S, Limani F, Lehr T, Bacac M, Walz AC. 2020. Predicting tumor killing and T-cell  
652 activation by T-cell bispecific antibodies as a function of target expression: combining in  
653 vitro experiments with systems modeling. *Molecular Cancer Therapeutics* **20**:357-366. DOI:  
654 [10.1158/1535-7163.MCT-20-0269](https://doi.org/10.1158/1535-7163.MCT-20-0269), PMID: [33298591](https://pubmed.ncbi.nlm.nih.gov/33298591/)

655 **Westermann J**, Pabst R. 1992. Distribution of lymphocyte subsets and natural killer cells in the  
656 human body. *Journal of Clinical Investigation* **70**:539-544. DOI: [10.1007/BF00184787](https://doi.org/10.1007/BF00184787), PMID:  
657 [1392422](https://pubmed.ncbi.nlm.nih.gov/1392422/)

658 **Xiong W**, Chen Y, Kang X, Chen Z, Zheng P, Hsu YH, Jang JH, Qin L, Liu H, Dotti G, Liu D.  
659 2018. Immunological synapse predicts effectiveness of chimeric antigen receptor cells.  
660 *Molecular Therapy* **26**:963-975. DOI: [10.1016/j.ymthe.2021.01.025](https://doi.org/10.1016/j.ymthe.2021.01.025), PMID: [33592166](https://pubmed.ncbi.nlm.nih.gov/33592166/)

661 **Zhu M**, Wu B, Brandl C, Johnson J, Wolf A, Chow A, Doshi S. 2016. Blinatumomab, a  
662 bispecific T-cell engager (BiTE) for CD-19 targeted cancer immunotherapy: clinical  
663 pharmacology and its implications. *Clinical Pharmacokinetics* **55**:1271-1288. DOI:  
664 [10.1007/s40262-016-0405-4](https://doi.org/10.1007/s40262-016-0405-4), PMID: [27209293](https://pubmed.ncbi.nlm.nih.gov/27209293/)

665 **Zhu M**, Kratzer A, Johnson J, Holland C, Brandl C, Singh I, Wolf A, Doshi S. 2018.  
666 Blinatumomab pharmacodynamics and exposure-response relationships in relapsed/refractory  
667 acute lymphoblastic leukemia. *Journal of Clinical Pharmacology* **58**:168-179. DOI:  
668 [10.1002/jcph.1006](https://doi.org/10.1002/jcph.1006), PMID: [28922466](https://pubmed.ncbi.nlm.nih.gov/28922466/)

669 **Zugmaier G**, Gökbuget N, Klinger M, Viardot A, Stelljes M, Neumann S, Horst HA, Marks R,  
670 Faul C, Diedrich H, Reichle A, Brüggemann M, Holland C, Schmidt M, Einsele H, Bargou RC,  
671 Topp MS. 2015. Long-term survival and T-cell kinetics in relapsed/refractory ALL patients who  
672 achieved MRD response after blinatumomab treatment. *Blood* **126**:2578-2584. DOI:  
673 [10.1182/blood-2015-06-649111](https://doi.org/10.1182/blood-2015-06-649111), PMID: [26480933](https://pubmed.ncbi.nlm.nih.gov/26480933/)

674

675

676

677

678

679

680

681

682

683

684

685
